# Supplementary material for: Biological Diversity, Ecological Health and Condition of Aquatic Assemblages at National Wildlife Refuges in Southern Indiana, USA
Source: Biodivers Data J. 2015 Jan 12;(3):e4300. doi: 10.3897/BDJ.3.e4300 (PMC4304268; doi:10.3897/BDJ.3.e4300)
Supplement: Supplementary material 2 — Comparison of Relative IBI Cumulative Distribution Frequency for sites sampled within the Patoka River drainage [file biodiversity_data_journal-3-e4300-s002.xls]

## Sheet: raw bugdata
		FWS	FWS	FWS	FWS	FWS	FWS	FWS	FWS	FWS	FWS	FWS	FWS	FWS	FWS	FWS	FWS	FWS	FWS	FWS	FWS	FWS	FWS	FWS	FWS	FWS	FWS	FWS	FWS	FWS	FWS	FWS	PNWR	PNWR	PNWR	PNWR	PNWR	PNWR	PNWR	PNWR	PNWR	PNWR	PNWR	PNWR	PNWR	PNWR	PNWR	PNWR	PNWR
	Site Number	07-186	07-186	07-173	07-173	07-043	07-043	07-167	07-167	07-057	07-057	07-024	07-024	07-171	07-171	07-174	07-174	07-009	07-104	07-104	07-080	07-080	07-071	07-071	07-054	07-054	07-075	07-075	07-146	07-146	07-012	07-012	07-015	07-024	07-009	07-004	07-004	07-wwtp	07-wwtp	07-038	07-038	07-026	07-014	07-027	07-005	07-021	07-018	07-020	07-020
	Sample Date	2007-04-16	2007-04-16	2007-04-17	2007-04-17	2007-04-09	2007-04-09	2007-04-19	2007-04-19	2007-04-09	2007-04-09	2007-04-09	2007-04-09	2007-04-19	2007-04-19	2007-04-19	2007-04-19	2007-04-17	2007-04-18	2007-04-18	2007-04-09	2007-04-09	2007-04-17	2007-04-17	2007-04-09	2007-04-09	2007-04-17	2007-04-17	2007-04-18	2007-04-18	2007-04-17	2007-04-17	2007-04-20	2007-04-19	2007-04-19	2007-04-18	2007-04-18	2007-04-16	2007-04-16	2007-04-18	2007-04-18	2007-04-19	2007-04-20	2007-04-20	2007-04-18	2007-04-20	2007-04-20	2007-04-16	2007-04-16
	vial #	1	1	2	2	3	3	4	4	5	5	6	6	7	7	8	8	9	10	10	11	11	12	12	13	13	14	14	15	15	16	16	17	18	19	20	20	21	21	22	22	23	24	25	26	27	28	29	29
			L&R		L&R		L&R		L&R		L&R		L&R		L&R		L&R			L&R		L&R		L&R		L&R		L&R		L&R		L&R					L&R		L&R		L&R								L&R
TURBELLARIA																		1											1
	Dugesia sp.																						4											9
	NEMERTEA
	Prostoma sp.																																	1														1
OLIGOCHAETA
	Branchiura sowerbyi						1																4				1
	Dero sp.																																					4		12
	Enchytraeidae																				11										1													1
	Limnodrilus sp.	3																									2
	Lumbricidae	1			2													1		2						3		1					2						2						2	2
	Lumbriculidae			5
	Nais communis															1		7			6						14				1							13							1
	Nais pardalis					3		2		4											96		1				2				1									2
	Nais variabilis	2						4																			18				6			108				2				1
	Potamothrix bavaricus																																														1
	Pristina leidyi
	Slavina appendiculata					2
	Tubifex tubifex
	Tubificidae with hair chaetae					1		3		3				1		18			1		11		3															5		1								1
	Tubificidae without hair chaetae	14				5		5		3		1		3		17		4	1		52		2		2		2				1			2		1		144		10			2	1	2		3	51
HIRUDINEA
	Erpobdella punctata																					1									1
	Mooreobdella fervida																																					1
ISOPODA
	Caecidotea sp.	100				7		103		5		39		427		256		3	285				2		6		2		124		1		5	85	18	233		3		215		2	205	5	7	1	18	44
	Lirceus sp.	2		292		109				122											1		68		180		34
AMPHIPODA
	Crangonyx sp.	2		27		2				1		3				1			3		2								19				3		9	2							2	2	14		1
	Hyalella azteca									2		3													1									6	1									1			2	2
	Synurella dentata					65		14		2				7									40						49							8				3					1
DECAPODA
	Cambarinae	4		1		5					4				6			1	9		1		3		1	2	2				1	1	1			1					2		1	5	3		11	4
	Cambarus diogenes
	Orconectes immunis														3		1	2		2				6				5				5
	Orconectes indianensis						1																	2		2
	Procambarus acutus																																																7
	Procambarus sp.
EPHEMEROPTERA
	Acerpenna pygmaea									10		11						1							3		8				5
	Ameletus sp.									1		6						2
	Baetis flavistriga																														1
	Caenis sp.	3				9				74		33		1				2			1		20		17		17				70			3		3				1				1			34
	Callibaetis sp.																										1
	Centroptilum / Procloeon sp.									1								1																													1
	Nixe sp.					4						41						6	5				2						19		7												1
	Paraleptophlebia sp.					1						19						13											3		19														1
	Plauditus dubius																														21
	Plauditus sp.					6				1		36						2					2
	Siphlonurus sp.																																												1
	Stenonema femoratum					5	3			11		5						1					17		3		8				4
ODONATA
	Argia sp.	2						3															2		1		7				1			2	1	1				1		2					5
	Boyeria sp.																																		1	2	1
	Calopteryx sp.					3	1	1					1					1									3								3					2	1		2				8	3
	Coenagrionidae	24				1				1								1			1		1		8		13		1		2			5		5				1				1			1	10
	Cordulegaster sp.																																										1		2
	Gomphidae
	Gomphus sp.								1																																1
	Ischnura sp.									1															2
	Libellula sp.	1																					2								1																	1
	Macromia sp.																																											1
	Progomphus obscurus								1
PLECOPTERA
	Amphinemura sp.					1						15							2				1						31		17				9	35							20		1	1	8
	Isoperla sp.					9				1		22						1					38						32		18												1
	Leuctra sp.																	1	2										21		1
	Perlodidae
HEMIPTERA
	Belostoma lutarium																										1										1
	Gerridae larvae																																			1
	Microvelia sp.																																1		1										1	1
	Notonecta irrorata																																												1
	Sigara modesta																	1
	Trichocorixa calva																																											1				1
TRICHOPTERA
	Cheumatopsyche sp.							1		1				1				2					2		2		4				8			1		2							1	1			9
	Chimarra sp.																																			2											5
	Hydropsyche betteni																						1		1																						1
	Hydropsyche sp. pupae						1
	Hydroptila sp.							1		2															1																	1		1			5	1
	Ironoquia sp.					1	2				1		2										1						2				1		3	1							1
	Neophylax sp.																	7
	Oecetis sp.							4																							1					1
	Polycentropus sp.																																												1
	Ptilostomis sp.																																												1
	Rhyacophila sp.										1																									1
MEGALOPTERA
	Chauliodes sp.																1
	Sialis sp.																																									1			1
COLEOPTERA
	Agabus semivittatus																																1
	Agabus sp.					6						18						7					2				1							2
	Berosus sp. larvae	12						1				1											1		1						1				2							2		2			8	2
	Dineutus sp. adults		1
	Dubiraphia sp. larvae and adults	1						6						3		2															1			2						1								8
	Enochrus pygmaeus nebulosus					1
	Gyrinus sp. adults																																											2
	Haliplus deceptus
	Helichus fastigiatus																																			4
	Helichus lithophilus											1
	Heterosternuta laetus																												2
	Heterosternuta pulcher					2																	2
	Hydroporinae					3						1											2																	1
	Neoporus dimidiatus													2																										3				1
	Neoporus undulatus	1																							1																				1
	Peltodytes dunavani																																													1
	Peltodytes duodecimpunctatus	9										1						2	1		1		1				3													1				2			2	1
	Peltodytes litoralis																				1
	Peltodytes muticus															1
	Peltodytes sexmaculatus													2																																		1
	Peltodytes sp. larvae																																							1								2
	Scirtes sp.															1																			1
	Stenelmis sp. larvae and adults					29		45		3		8											11		28		10				3				30	4							1	1			11
	Tropisternus sp. larvae									1
DIPTERA
	Ablabesmyia sp.																	1																								1					1
	Acricotopus sp.
	Aedes / Ochlerotatus																																													2
	Bezzia / Palpomyia sp.															1																			1
	Ceratopogoninae							2								7																								5		7		1			1	8
	Chaetocladius sp.																	24											1				4										3	1		1
	Chaoborus sp.											2
	Chironomini							2		1						1		1							1						1
	Chironomus sp.	7				5		10								23		2					7											1				304		2		1				1		5
	Cladopelma sp.
	Cladotanytarsus sp.					1		1				1																																			1
	Clinocera sp.																														1
	Clinotanypus sp.																																			1
	Corynoneura sp.					1						1						1																									1					1
	Cricotopus sp.	78				26		92		12		20		6		14		208	1		55		109		20		76		5		131		2	43	2	4				45		3	86	8			127	129
	Cryptochironomus sp.	1						2																	1															1							1
	Cryptotendipes sp.																																							9
	Dasyhelea sp.																																									5						1
	Diamesa sp.											3						1													1
	Dicrotendipes sp.	12								5								8					2		1		10													1
	Dolichopodidae																				1
	Endochironomus sp.	1																																1
	Ephydridae									1																																						1
	Eukiefferiella sp.																																										3
	Glyptotendipes sp.															1																														1
	Hemerodromia sp.							1																							3									2							2
	Hydrobaenus sp.	2				1		3				1						1																1						3			2	1			5	1
	Larsia sp.	1		3		1		1				2				1					3								1					2	1
	Limnophyes sp.					1						1						4																	2												1
	Micropsectra sp.					1						2						4					1											1						1		1	1					2
	Microtendipes sp.					1
	Nanocladius sp.																																	5
	Natarsia sp.			7		1																	1
	Parachironomus sp.																																	1
	Parakiefferiella sp.
	Paralauterborniella sp.															1
	Parametriocnemus sp.											1																								1
	Paratanytarsus sp.							7		2						1							4								1									1								8
	Paratendipes sp.											2				4		1					1				2
	Pentaneura sp.																																							1
	Phaenopsectra sp.
	Pilaria sp.																																										1
	Polypedilum sp.	4				5		5		21		5						7			9		4		13		28				25			7	2	2				2			1	2	5
	Potthastia longimana group																						1
	Procladius sp.																																	2										1				1
	Psectrocladius sp.
	Pseudochironomus sp.					1																	1		2		6
	Pseudorthocladius sp.
	Rheocricotopus sp.																												3
	Rheotanytarsus sp.									2						1									1		5				2			47	1								1				1
	Simulium sp.	7						10		1				45		1							6		2									28	10					10		1
	Smittia sp.																				1
	Stenochironomus sp.																																														2
	Tabanidae																			1			1													2						1			1		1
	Tanypodinae											1
	Tanypus sp.																																															1
	Tanytarsus sp.					1		5		4		1				25		5							2		9				4					2				6				1	3		4	1
	Thienemanniella sp.	1				1																					1				1			1									9
	Thienemannimyia group					5		1		1		12						7			5		6		3		6				10				2					1		1		2			12
	Tipula sp.								6				2											2				1		2		2				4	2
	Tipulidae pupae
	Zavrelimyia sp.			1														8	2										17
GASTROPODA
	Gyraulus sp.															1
	Helisoma sp.								2								1					3			1																							6
	Lymnaeidae	1				2													2		3						1																					13
	Physa sp.	7				1				2				30		2		2	4		42				6		21									1		1				6						9
BIVALVIA
	Corbicula sp.	4						5		1																														2								3
	Pisidium sp.							4		1				3		18		1	14		3		1		1		1											23
	Sphaeriidae													1																										1
	Sphaerium sp.													2	1																							26										7
	COUNT	29	1	7	1	41	6	30	4	34	3	34	3	15	3	24	3	42	14	3	21	2	41	3	30	3	33	3	17	1	37	3	9	25	20	26	3	11	1	32	3	16	22	25	20	9	32	33	1
	SUM	307	1	336	2	335	9	344	10	304	6	319	5	534	10	399	3	356	332	5	306	4	380	10	312	7	319	7	331	2	374	8	20	366	100	324	4	526	2	348	4	36	346	46	50	11	293	330	7
[truncated: 8 more columns]
